# Supplementary material for: Association between Maternal Pre-pregnancy Body Mass Index and Breastfeeding Duration in Taiwan: A Population-Based Cohort Study
Source: PubMed Central journal article supplement (PMC7468738; doi:10.3390/nu12082361), 2020-08-07
Supplement: nutrients-12-02361-s001.pdf [file nutrients-12-02361-s001.pdf]

## Supplementary material

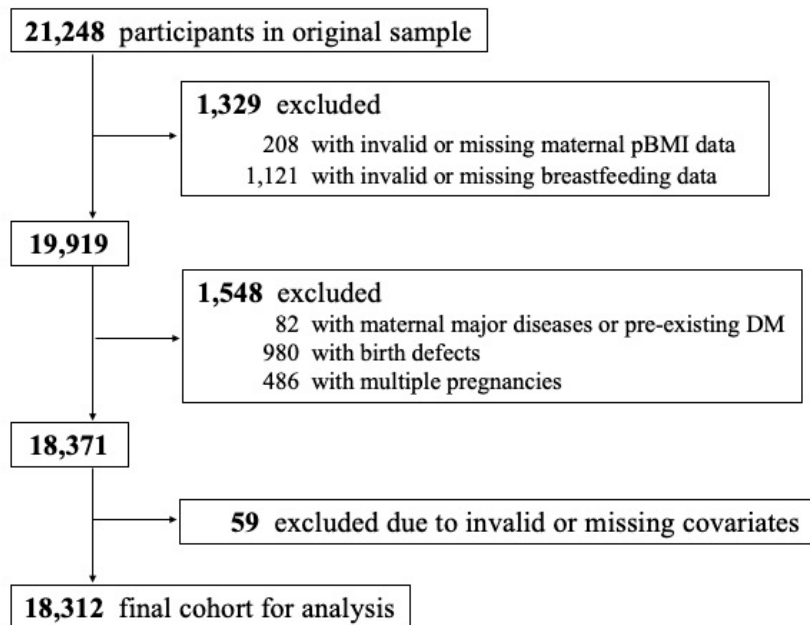

Figure S1. Flow chart of the study population.

Table S1. Breastfeeding rates and duration among women in different gestational weight gain categories.

|                                                | Crude OR  | 95% CI     | Adjusted OR* | 95% CI     |
|------------------------------------------------|-----------|------------|--------------|------------|
| Breastfeeding cessation at 2 months postpartum |           |            |              |            |
| Inadequate GWG                                 | 1.11      | 1.03, 1.19 | 1.09         | 1.02, 1.18 |
| Adequate GWG                                   | Reference | -          | Reference    | -          |
| Excessive GWG                                  | 1.21      | 1.12, 1.29 | 1.1          | 1.02, 1.18 |
| Breastfeeding cessation at 4 months postpartum |           |            |              |            |
| Inadequate GWG                                 | 1.09      | 1.01, 1.18 | 1.11         | 1.02, 1.2  |
| Adequate GWG                                   | Reference | -          | Reference    | -          |
| Excessive GWG                                  | 1.18      | 1.01, 1.27 | 1.07         | 0.99, 1.16 |
| Breastfeeding cessation at 6 months postpartum |           |            |              |            |
| Inadequate GWG                                 | 1.01      | 0.93, 1.09 | 1.02         | 0.93, 1.11 |
| Adequate GWG                                   | Reference | -          | Reference    | -          |
| Excessive GWG                                  | 1.14      | 1.05, 1.23 | 1.03         | 0.94, 1.12 |

\*Adjusted for maternal age, maternal education, maternal immigration status, urbanicity of living area, maternal gestational diabetes, cesarean delivery, employment status at 6 months postpartum, preterm delivery, marital status, dyad separation, and smoking during pregnancy. Abbreviations: GWG, gestational weight gain.

**Table S2.** Association between pre-pregnancy body mass index status and early breastfeeding cessation at different periods after excluding mothers who never breastfed.

|                                                | Crude OR  | 95% CI     | Adjusted OR* | 95% CI     |
|------------------------------------------------|-----------|------------|--------------|------------|
| Breastfeeding cessation at 2 months postpartum |           |            |              |            |
| Underweight                                    | 1.16      | 1.07, 1.27 | 1.13         | 1.03, 1.23 |
| Normal                                         | Reference | -          | Reference    | -          |
| Overweight                                     | 1.07      | 0.94, 1.21 | 0.9          | 0.79, 1.03 |
| Obese                                          | 1.43      | 1.1, 1.84  | 1.04         | 0.8, 1.36  |
| Breastfeeding cessation at 4 months postpartum |           |            |              |            |
| Underweight                                    | 1.33      | 1.22, 1.44 | 1.35         | 1.24, 1.48 |
| Normal                                         | Reference | -          | Reference    | -          |
| Overweight                                     | 1.03      | 0.92, 1.17 | 0.87         | 0.76, 0.99 |
| Obese                                          | 1.33      | 1.02, 1.73 | 0.97         | 0.73, 1.27 |
| Breastfeeding cessation at 6 months postpartum |           |            |              |            |
| Underweight                                    | 1.3       | 1.19, 1.42 | 1.32         | 1.2, 1.46  |
| Normal                                         | Reference | -          | Reference    | -          |
| Overweight                                     | 0.96      | 0.84, 1.09 | 0.79         | 0.69, 0.91 |
| Obese                                          | 1.28      | 0.97, 1.7  | 0.92         | 0.68, 1.24 |

\*Adjusted for maternal age, parity, maternal education, maternal immigration status, urbanicity of living area, maternal gestational diabetes, cesarean delivery, employment status at 6 months postpartum, preterm delivery, marital status, dyad separation, gestational weight gain and smoking during pregnancy
